## RESEARCH ARTICLE

# Potentiating V $\gamma$ 9V $\delta$ 2 T cell proliferation and assessing their cytotoxicity towards adherent cancer cells at the single cell level

Chenxiao Liu<sup>1,\*</sup>, Karolina Skorupinska-Tudek<sup>2</sup>, Sven-Göran Eriksson<sup>3</sup> and Ingela Parmryd<sup>1,3,‡</sup>

## ABSTRACT

V $\gamma$ 9V $\delta$ 2 T cells is the dominant  $\gamma\delta$  T cell subset in human blood. They are cytotoxic and activated by phosphoantigens whose concentrations are increased in cancer cells, making the cancer cells targets for V $\gamma$ 9V $\delta$ 2 T cell immunotherapy. For successful immunotherapy, it is important both to characterise V $\gamma$ 9V $\delta$ 2 T cell proliferation and optimise the assessment of their cytotoxic potential, which is the aim of this study. We found that supplementation with freshly thawed human serum potentiated V $\gamma$ 9V $\delta$ 2 T cell proliferation from peripheral mononuclear cells (PBMCs) stimulated with (*E*)-4-Hydroxy-3-methyl-but-2-enyl diphosphate (HMBPP) and consistently enabled V $\gamma$ 9V $\delta$ 2 T cell proliferation from cryopreserved PBMCs. In cryopreserved PBMCs the proliferation was higher than in freshly prepared PBMCs. In a panel of short-chain prenyl alcohols, monophosphates and diphosphates, most diphosphates and also dimethylallyl monophosphate stimulated V $\gamma$ 9V $\delta$ 2 T cell proliferation. We developed a method where the cytotoxicity of V $\gamma$ 9V $\delta$ 2 T cells towards adherent cells is assessed at the single cell level using flow cytometry, which gives more clear-cut results than the traditional bulk release assays. Moreover, we found that HMBPP enhances the V $\gamma$ 9V $\delta$ 2 T cell cytotoxicity towards colon cancer cells. In summary, we have developed an easily interpretable method to assess the cytotoxicity of V $\gamma$ 9V $\delta$ 2 T cells towards adherent cells, found that V $\gamma$ 9V $\delta$ 2 T cell proliferation can be potentiated by media-supplementation and how misclassification of non-responders may be avoided. Our findings will be useful in the further development of V $\gamma$ 9V $\delta$ 2 T cell immunotherapy.

**KEY WORDS:** Colon cancer, Cytotoxicity assay, Phosphoantigens, Proliferation, V $\gamma$ 9V $\delta$ 2 T cells

## INTRODUCTION

V $\gamma$ 9V $\delta$ 2 T cells are found in primates and are part of the innate immune system (Morita et al., 2007) and also function as a bridge between the innate and adaptive immune systems since they possess antigen presenting capacity towards both CD4<sup>+</sup> and CD8<sup>+</sup>  $\alpha\beta$  T cells (Brandes et al., 2005; 2009). V $\gamma$ 9V $\delta$ 2 T cells comprise about

3–5% of the normal circulating T cell population (Andreu-Ballester et al., 2012; Tan et al., 2016), but after a week's infection can increase to 60% of total circulating T cells (Morita et al., 2007). V $\gamma$ 9V $\delta$ 2 T cells are activated by small non-peptide compounds, phosphoantigens, of which the most potent, (*E*)-4-hydroxy-3-methyl-but-2-enyl diphosphate (HMBPP), is produced in the 2-C-methyl-D-erythritol 4-phosphate pathway for isoprenoid synthesis (Hintz et al., 2001; Jomaa et al., 1999). This pathway is present in plants and many pathogens but is absent in humans, who instead use the mevalonate pathway for isoprenoid synthesis. In the mevalonate pathway, the intermediate isopentenyl diphosphate (IPP) is a well-known phosphoantigen (Tanaka et al., 1995).

Phosphoantigens, released by for instance *P. falciparum* infected erythrocytes (Liu et al., 2018), activate V $\gamma$ 9V $\delta$ 2 T cells via interactions with the intracellular B30.2 domain (Sandstrom et al., 2014; Wang and Morita, 2015) of the almost ubiquitously expressed protein CD277/butyrophilin-3A1 (BTN3A1) (Harly et al., 2012). Upon phosphoantigen interaction the BTN3A1 undergoes a conformational change that is sensed by the V $\gamma$ 9V $\delta$ 2 T cells (Gu et al., 2017; Yang et al., 2019). The release of phosphoantigens by erythrocytes requires that they must cross the plasma membrane of BTN3A1-expressing cells for activation to occur, which is an energy-dependent process (Kilcollins et al., 2016).

Cancer cells frequently have an upregulated mevalonate pathway due to increased metabolic demands (Gottesman et al., 2002; Gruenbacher and Thurnher, 2015), which causes the accumulation of IPP and other isoprenoid diphosphates that can activate and cause the proliferation of V $\gamma$ 9V $\delta$ 2 T cells (Gruenbacher et al., 2014). The subsequent infiltration of V $\gamma$ 9V $\delta$ 2 T cells in the tumours results in tumour immunosurveillance (Fowler and Bodman-Smith, 2015) and V $\gamma$ 9V $\delta$ 2 T cells have been shown to kill a broad range of cancer cells (Angelini et al., 2004; Das et al., 2001; Gertner et al., 2007; Wrobel et al., 2007). Inhibitors of the mevalonate-pathway enzyme farnesyl diphosphate synthase, aminobisphosphonates (van Beek et al., 1999) and alkylamines (Thompson et al., 2006), that lead to the intracellular accumulation of the phosphoantigen IPP also lead to the activation of V $\gamma$ 9V $\delta$ 2 T cells.

Circulating V $\gamma$ 9V $\delta$ 2 T cells in cancer patients are less abundant and/or less responsive than those in healthy individuals (Gaafar et al., 2009; Petrini et al., 2011; Puan et al., 2009; Saitoh et al., 2008; Toia et al., 2016; Wilhelm et al., 2003). This suggests that the V $\gamma$ 9V $\delta$ 2 T cells are important in the protection against cancer. It is currently not known whether the V $\gamma$ 9V $\delta$ 2 T cell numbers decrease as result of the disease or whether individuals with low fractions of circulating V $\gamma$ 9V $\delta$ 2 T cells are predisposed to developing cancer. However, there seems to be no correlation between the circulating percentage of V $\gamma$ 9V $\delta$ 2 T cells in PBMCs and their ability to proliferate in the presence of phosphoantigens (Cabillic et al., 2010), making V $\gamma$ 9V $\delta$ 2 T cells promising candidates for immunotherapy.

To assess the cytotoxicity of V $\gamma$ 9V $\delta$ 2 T cells towards adherent target cells, which includes most types of cancer cells, the target

<sup>1</sup>Science for Life Laboratory, Department of Medical Cell Biology, Uppsala University, 751 23 Uppsala, Sweden. <sup>2</sup>Laboratory of Lipid Biochemistry, Institute of Biochemistry and Biophysics, Polish Academy of Sciences, 02-106 Warsaw, Poland. <sup>3</sup>Department of Biomedicine, The Sahlgrenska Academy, University of Gothenburg, 405 30 Gothenburg, Sweden.

\*Present address: Department of Infectious Disease, Southern University of Science and Technology, Shenzhen, Guangdong, 518020, PR China.

‡Author for correspondence (ingela.parmryd@gu.se)

© C.L., 0000-0002-5349-2366; K.S., 0000-0002-3472-2517; I.P., 0000-0003-4834-3611

This is an Open Access article distributed under the terms of the Creative Commons Attribution License (<https://creativecommons.org/licenses/by/4.0>), which permits unrestricted use, distribution and reproduction in any medium provided that the original work is properly attributed.

cells are usually labelled, commonly with  $^{51}\text{Cr}$  (Capietto et al., 2011; Fisher et al., 2014b; Wrobel et al., 2007). Cytotoxicity is then monitored by the appearance of label in the media. Besides the hazard of working with a radiolabel, this type of bulk assay fails to differentiate between leakage from live cells and release from dead cells. Therefore, the same numerical response could originate from widely different combinations of live, damaged and dead cells. For target cells that grow in suspension, FACS-based cytotoxicity methods are frequently used (Cosan et al., 2017; Jedema et al., 2004; Lecoeur et al., 2001; Sawaisorn et al., 2019), but for adherent target cells this approach is rare. FACS-based cytotoxicity assays are based on the differential staining of mostly intact dead versus live cells, but is unable to account for cells that disintegrate. Thus, there is a general need for more informative cytotoxicity tests, particularly for adherent target cells.

In this study, we have developed a flow cytometry-based method that reports cell death at the single cell level, to assess the cytotoxicity of  $\text{V}\gamma 9\text{V}\delta 2$  T cells towards adherent cells. We have also addressed how DMSO affects  $\text{V}\gamma 9\text{V}\delta 2$  T cell proliferation capacity and addressed how  $\text{V}\gamma 9\text{V}\delta 2$  T cells in PBMCs proliferate in response to isoprenoid alcohols, monophosphates and diphosphates. Moreover, we found that reactivation increases  $\text{V}\gamma 9\text{V}\delta 2$  T cell cytotoxicity towards colon cancer cells and found a crucial role for supplementation of freshly thawed serum in  $\text{V}\gamma 9\text{V}\delta 2$  T cell proliferation.

## RESULTS

### Cryopreservation of PBMCs enhances the $\text{V}\gamma 9\text{V}\delta 2$ T cell proliferative response

In  $\text{V}\gamma 9\text{V}\delta 2$  T cell immunotherapy clinical trials, multiple cell infusions of expanded cells are performed (Fisher et al., 2014a), and repeated expansion from the same PBMC batch could prove advantageous. Hence, being able to preserve cells without loss of function is desirable. To assess whether cryopreservation affected the extent of  $\text{V}\gamma 9\text{V}\delta 2$  T cell proliferation, freshly prepared and cryopreserved PBMCs from the same donors were compared using a linear statistical model encompassing data from 11 donors. From cryopreserved PBMCs, stimulated with the phosphoantigen HMBPP and lymphocyte growth stimulatory interleukin IL-2,  $\text{V}\gamma 9\text{V}\delta 2$  T cells proliferated from all donors tested. Interestingly, the  $\text{V}\gamma 9\text{V}\delta 2$  T cell proliferation from cryopreserved PBMCs was actually higher than that from freshly prepared PBMCs from the same donors (Fig. 1). Cryopreservation resulted in substantial overall cell loss (about 40%), but the fraction of  $\text{V}\delta 2+\text{CD}3+$  lymphocytes was not significantly different in freshly prepared and cryopreserved PBMCs from the same donors, suggesting that variability in survival is not the cause of the difference in proliferation (data not shown).

### DMSO enhances the phosphoantigen-induced proliferation of cryopreserved $\text{V}\gamma 9\text{V}\delta 2$ T cells

Our finding that  $\text{V}\gamma 9\text{V}\delta 2$  T cells could be more efficiently proliferated from cryopreserved PBMCs than freshly prepared PBMCs prompted us to investigate the underlying reason. Although the cryopreserved PBMCs were washed twice after thawing, it seemed possible that some of the DMSO, used at 10% (vol) during cryopreservation, remained in the media after washing the cells and/or was excreted into the media after the cells had been thawed. We therefore tested whether DMSO had any effect on  $\text{V}\gamma 9\text{V}\delta 2$  T cell proliferation stimulated by HMBPP, using the same linear model as above. Interestingly, the presence of 0.1% DMSO enhanced the  $\text{V}\gamma 9\text{V}\delta 2$  T cell proliferation from cryopreserved PBMCs, but it did not result in any statistically significant effect on

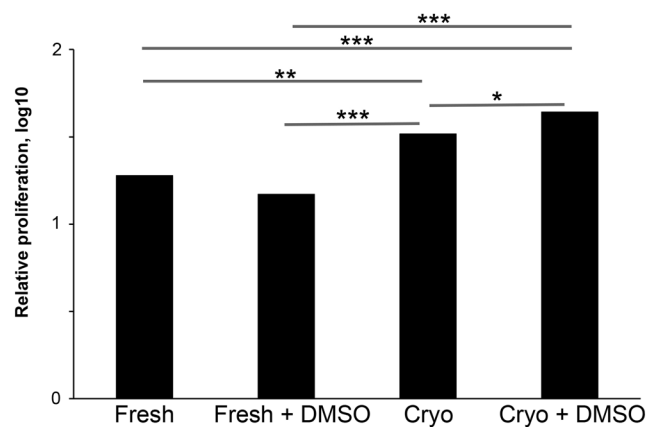

**Fig. 1. The effect of DMSO on  $\text{V}\delta 2$  T cell proliferation.** Freshly isolated and cryopreserved PBMCs were stimulated with 80 pM HMBPP $\pm$ 0.1% DMSO. 25 U/ml IL-2 was added on days 3, 5 and 7. Proliferation was assessed on days 11-12. For the statistical analysis, the data were transformed to the log<sub>10</sub>-scale. A linear statistical model based on data from 11 donors with freshly prepared or cryopreserved samples, with or without DMSO, donors and the experimental date, were used as explanatory factors. The response variable in the model was relative proliferation after 10-logarithmic transformation. Relative proliferation was defined as the difference between the absolute number of  $\text{V}\delta 2$  T cells at the end and the start of the experiment with the proliferation of the negative control (IL-2 only) subtracted. Data shown are effects from different treatments. \* $P=1.2\times 10^{-2}$ , \*\* $P=0.0071$  and \*\*\* $P<0.001$  for a two-tailed *t*-test.

proliferation from freshly prepared PBMCs (Fig. 1). As expected, a higher DMSO concentration (2.5%) killed both the freshly prepared and cryopreserved PBMCs (data not shown).

### Freshly thawed serum supplementation is important for $\text{V}\gamma 9\text{V}\delta 2$ T cell proliferation

It is well known that primary cells are more sensitive to growth conditions than most cultured cells and that the glutamate in cell media is quickly degraded, but the importance of freshly thawed serum for  $\text{V}\gamma 9\text{V}\delta 2$  T cell proliferation has, to our knowledge, not been considered. We therefore assessed the effect of freshly thawed serum on the proliferation of  $\text{V}\gamma 9\text{V}\delta 2$  T cells. Complete medium that had been stored for 17 days at 4°C was compared with freshly made complete medium. Glutamine was added to both media at the start of the experiment since it is known to decompose upon storage of media (Heeneman et al., 1993). Proliferation stimulated by HMBPP and IL-2 was consistently greater with the media where freshly thawed serum was supplemented at the start of the experiment (Fig. 2) indicating that some serum components are quickly lost during storage at 4°C. After proliferation with HMBPP, the population of  $\text{V}\gamma 9\text{V}\delta 2$  T cells were mainly of central and effector memory phenotypes (not shown).

Previously, we noticed that when using stored complete medium (up to 6 months old),  $\text{V}\gamma 9\text{V}\delta 2$  T cells from healthy donors aged 20-65 years occasionally failed to proliferate from PBMCs, but after switching to using medium supplemented with freshly thawed serum  $\text{V}\gamma 9\text{V}\delta 2$  T cell proliferation occurred with all healthy donors (data not shown). Our data demonstrate that the use of stored medium can reduce the  $\text{V}\gamma 9\text{V}\delta 2$  T cell proliferative response and even cause the misclassification of responders as non-responders.

### $\text{V}\gamma 9\text{V}\delta 2$ T cells proliferate in response to a range of isoprenoid diphosphates length C5-C20 and the monophosphate DMAP

Whether isoprenoid monophosphates and alcohols can stimulate  $\text{V}\gamma 9\text{V}\delta 2$  T cell proliferation from PBMCs has, to be best of our

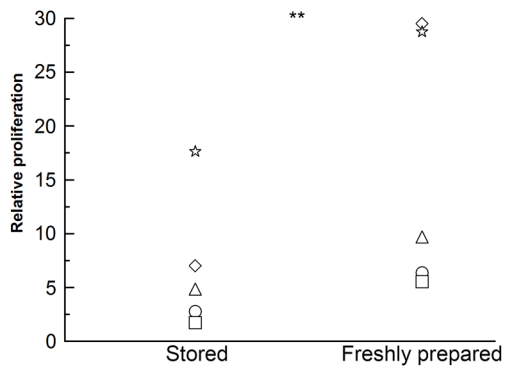

**Fig. 2. Freshly added serum improves V $\delta$ 2 T cell proliferation.**

Cryopreserved PBMCs were seeded at  $1 \times 10^6$  cells/ml and stimulated with 80 pM HMBPP. 25 U/ml IL-2 was added on days 3, 5 and 7. On day 0 and after 11 days, the PBMCs and the stimulated cultures were assessed for their CD3 and V $\delta$ 2 expression by flow cytometry analysis. Relative proliferation is defined as the difference in the absolute number of V $\delta$ 2 T cells at the end and the start of the experiment with the proliferation of the negative control (IL-2 only) subtracted. The data shown are the means of two biological replicates. Fresh covers the supplementation of freshly thawed heat-inactivated human AB serum and glutamine just before use. Stored covers media with human AB serum added 17 days prior to the start of the experiment stored at 4°C with freshly thawed glutamine added just before use. The data were transformed to the log<sub>10</sub>-scale for the statistical analysis. \*\* $P=0.0055$  for a two-tailed paired *t*-test,  $n=5$ .

knowledge, not been systematically addressed. Isoprenoid alcohols do not qualify as phosphoantigens per se, but they can be taken up by cells and used for protein prenylation (Parmryd et al., 1999), strongly suggesting that they are converted intracellularly into their diphosphate counterparts, i.e. phosphoantigens. However, at 25  $\mu$ M none of the isoprenoid alcohols, isopentenol (C5), dimethylallyl alcohol (DMA, C5), geraniol (G, C10) or farnesol (F, C15) were able to stimulate V $\gamma$ 9V $\delta$ 2 T cell proliferation (Fig. 3A). Varying the concentration of DMA from 0.25–250  $\mu$ M did not alter this conclusion (data not shown). In two experiments, the longer alcohols geranylgeraniol (GG, C20) and heptaprenol (HP, C35) were also unable to cause V $\gamma$ 9V $\delta$ 2 T cell proliferation.

Isoprenoid monophosphates are genuine phosphoantigens, i.e. small non-peptide antigens with phosphate groups (Burk et al., 1995; Gossman and Oldfield, 2002). Out of a panel of five isoprenoid monophosphates, the only one that stimulated a proliferation response at 25  $\mu$ M was dimethylallyl monophosphate (DMAP) (Fig. 3B). This was examined in a larger group of donors where a proliferation response was seen in seven out of eight donors (Fig. 3C).

Until recently, the single isoprenoid unit diphosphate IPP was considered to outperform its longer counterparts in activating V $\gamma$ 9V $\delta$ 2 T cells (Morita et al., 2007). However, the study used V $\gamma$ 9V $\delta$ 2 T cell clones and clones appear to respond differently to phosphoantigen stimulation than PBMCs, whose stimulation with diphosphates one to four isoprenoid units long have been reported to be comparable (Gruenbacher et al., 2014). Upon testing a panel of isoprenoid diphosphates for their ability to stimulate V $\gamma$ 9V $\delta$ 2 T cell proliferation from PBMCs, we found that 25  $\mu$ M IPP, DMAPP (dimethyl allyl diphosphate), FPP (farnesyl diphosphate) and GGPP (geranylgeranyl diphosphate) were all effective (Fig. 3D). Geranyl diphosphate (GPP) showed the same tendency but did not reach statistical significance ( $P=0.17$ ), possibly because of the concentration chosen since substantial proliferation was observed with GPP at 56  $\mu$ M ( $P=0.0027$ ,  $N=2$ ). In two experiments,

heptaprenyl diphosphate (HPPP) did not stimulate V $\gamma$ 9V $\delta$ 2 T cell proliferation.

### V $\gamma$ 9V $\delta$ 2 T cell cytotoxicity towards adherent colon cancer cells can be measured using flow cytometry

To study the cytotoxicity of V $\gamma$ 9V $\delta$ 2 T cells against adherent cells, methods that measure the bulk release, typically of  $^{51}$ Cr or CFSE, from the target cells are usually employed. Unfortunately, these methods are neither very precise nor accurate. We therefore set out to develop a flow cytometry method for measuring V $\gamma$ 9V $\delta$ 2 T cell cytotoxicity towards adherent target cells, a method that reports the absolute number of dead cells. Routinely, large effector cell numbers are used in cytotoxicity assays, but the limited number of V $\gamma$ 9V $\delta$ 2 cells in small volume patient samples is a constraint. We therefore developed a protocol for small numbers of effector cells, using polypropylene 96-well round bottom plates. Assays in FACS tubes typically require a volume of at least 200  $\mu$ l, but in the wells we were able to use only 50  $\mu$ l. The number of target cells used was limited to 2500, which were incubated with the desired number of effector cells.

For the flow cytometry analysis to accurately report on the number of target cells killed, it requires that all the target cells are in suspension at the end of the incubation. However, the target cells may firmly adhere to the surface in which the cytotoxicity assay takes place. By microscopy, we confirmed that SW620 cells remained attached at the bottom of the wells after suspension with a 100  $\mu$ l pipette after a 4 h incubation at 37°C (Fig. S1). The same was found with HT29, SW420 and Colo205 cells (not shown).

Flow cytometry-based cytotoxicity methods that rely on assessing the number of live and/or stained dead cells at the end of an experiment understate the cytotoxicity, since cells that disintegrate are not registered. To circumvent this problem, a constant number of microbeads was added to each sample as a counting reference (Fig. 4A). The target cells were identified using CFSE and 7-AAD staining to differentiate between live and dying/dead cells (Fig. 4B). Note that most 7-AAD positive cells do not appear in the gated population since dead cells have altered forward and side scatter compared with the gated population. An illustration of the FACS output of our assay is found in Fig. 5C. By incrementally increasing the number of effector V $\gamma$ 9V $\delta$ 2 T cells, a corresponding decrease in live target cells in the upper left quadrant can be seen. As the effector to target ratio is increased, the increase of effector cells is evident in the lower left quadrant.

### HMBPP improves the cytotoxicity of V $\gamma$ 9V $\delta$ 2 T cells towards adherent colon cancer cells

Phosphoantigens have been reported to increase the cytotoxicity of V $\gamma$ 9V $\delta$ 2 T cells when used for restimulation before and/or during the mixing of the effector cells with suspension target cells (Dunne et al., 2010). We wanted to address whether this also holds for adherent target cells and therefore assessed the V $\gamma$ 9V $\delta$ 2 T cell cytotoxicity towards colon cancer-derived cell lines HT29 (stage II-III) and SW620 (stage III) in the presence of HMBPP at a range of effector to target cell ratios. Across the whole range of E:T ratios from 6.25:1 to 50:1, the presence of HMBPP enhanced the cytotoxicity of V $\gamma$ 9V $\delta$ 2 T cell towards SW620 cells and for HT29 cells and an enhancing effect was found for the ratios 6.25:1 to 25:1 (Fig. 5). For SW620 cells, the effect of HMBPP stimulation of V $\gamma$ 9V $\delta$ 2 T cell cytotoxicity was also assessed at lower E:T ratios and found to have a potentiating effect at all ratios tested including one as low as 1:1 (Fig. S2). To assess the accuracy of the V $\gamma$ 9V $\delta$ 2 T cell flow cytometry cytotoxicity method, 95% confidence intervals for the fraction of dead cells were calculated for

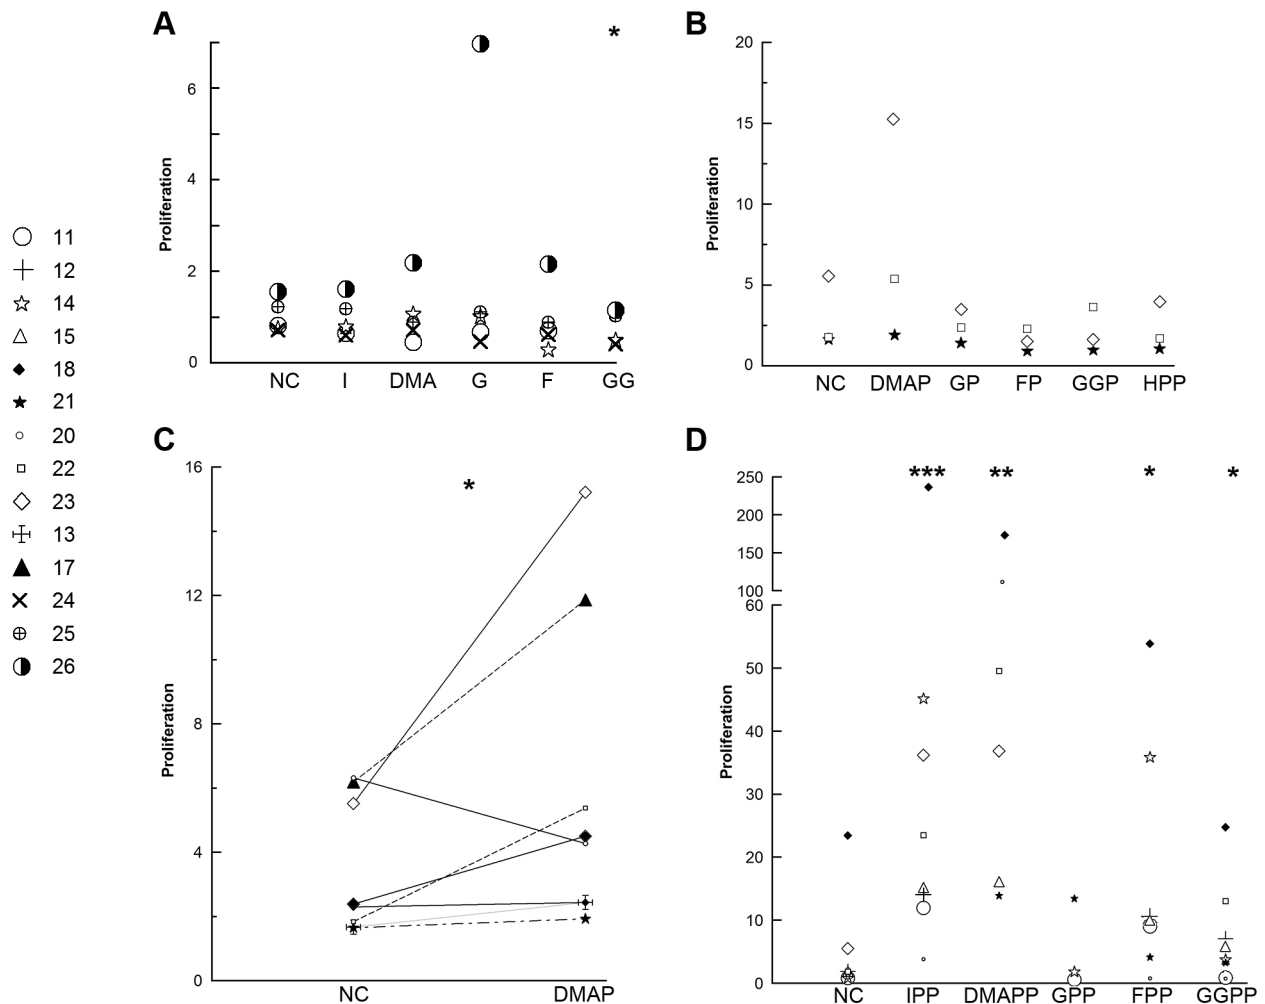

**Fig. 3. Proliferation of V $\delta$ 2 T cells from PBMCs stimulated by isoprenoid alcohols, mono- and diphosphates.** (A) Cryopreserved PBMCs were seeded at  $1 \times 10^6$  live cells/ml and stimulated with 25  $\mu$ M isopentenol (I), dimethylallyl alcohol (DMA), geraniol (G), farnesol (F) or geranylgeraniol (GG). (B) Freshly isolated PBMCs were seeded at  $1 \times 10^6$  live cells/ml and stimulated with 25  $\mu$ M DMAP, GP, FP, GGP or heptaprenyl phosphate (HPP). (C) Cryopreserved PBMCs were seeded at  $1 \times 10^6$  live cells/ml and stimulated with 25  $\mu$ M DMAP. (D) Freshly isolated or cryopreserved PBMCs were seeded at  $1 \times 10^6$  live cells/ml and stimulated with 25  $\mu$ M IPP, DMAPP, GPP, FPP or GGPP. 25 U/ml IL-2 was added on days 3, 5 and 7. On day 0 and after 11-12 days, the PBMCs and the stimulated cultures were assessed for their CD3 and V $\delta$ 2 expression by flow cytometry. Proliferation is defined as the difference between the absolute number of V $\delta$ 2 T cells at the end and the start of the experiment and the data shown are the means of two biological replicates. NC=negative control (IL-2 only). The data were transformed to the log<sub>10</sub>-scale for the statistical analysis. \* $P < 0.05$ , \*\* $P < 0.01$  and \*\*\* $P < 0.001$  for a one-tailed paired *t*-test,  $n = 3-8$ .

mean values obtained from three biological replicates (Table 1). The size of the intervals was similar for all effector to target cell ratios.

## DISCUSSION

Samples are rarely collected synchronously from individual donors, but it is advantageous to characterise and proliferate V $\gamma$ 9V $\delta$ 2 T cells from multiple donors concurrently, both for efficiency and comparability. Hence being able to cryopreserve cells without loss of function is desirable. We found that the V $\gamma$ 9V $\delta$ 2 T cells that survived cryopreservation had a greater proliferative capacity than V $\gamma$ 9V $\delta$ 2 T cells in freshly prepared PBMCs from the same donor. This differs from a previous study that found that proliferation of V $\gamma$ 9V $\delta$ 2 T cells is considerably lower in cryopreserved PBMCs than freshly prepared samples (Siegers et al., 2012). The discrepancy may be attributed to differential media supplementation with freshly thawed serum, which we found was an important requirement for efficient proliferation of V $\gamma$ 9V $\delta$ 2 T cells. Interestingly, DMSO increased the proliferation from the cryopreserved PBMCs, but not from freshly prepared PBMCs,

suggesting that freezing and thawing may make cells more susceptible to this treatment. Other supplements reported to increase V $\gamma$ 9V $\delta$ 2 T cell proliferation include IL-15, vitamin C and its more stable phosphorylated derivative (Kouakanou et al., 2020; Van Acker et al., 2016). A combination of these supplements may lead to even more efficient V $\gamma$ 9V $\delta$ 2 T cell proliferation of importance for immunotherapy approaches.

We did not find any difference in the percentage of V $\delta$ 2+ T cells in freshly prepared and cryopreserved PBMCs from the same donors, but still it is possible that a minor population of Tregs that restrict V $\gamma$ 9V $\delta$ 2 T cell proliferation are specifically eliminated by cryopreservation. The higher V $\gamma$ 9V $\delta$ 2 T cell proliferation from the cryopreserved PBMCs may also simply reflect that only the fittest cells survive thawing and freezing.

V $\gamma$ 9V $\delta$ 2 T cells can kill a broad range of cancer cells and show potential for use in immunotherapy with several clinical trials showing promise (Cabillic et al., 2010; Nakajima et al., 2010; Wada et al., 2014). It has been shown that the radiosensitivity of  $\gamma\delta$  T cells does not differ from that of  $\alpha\beta$  T cells (Lisowska et al., 2010), which

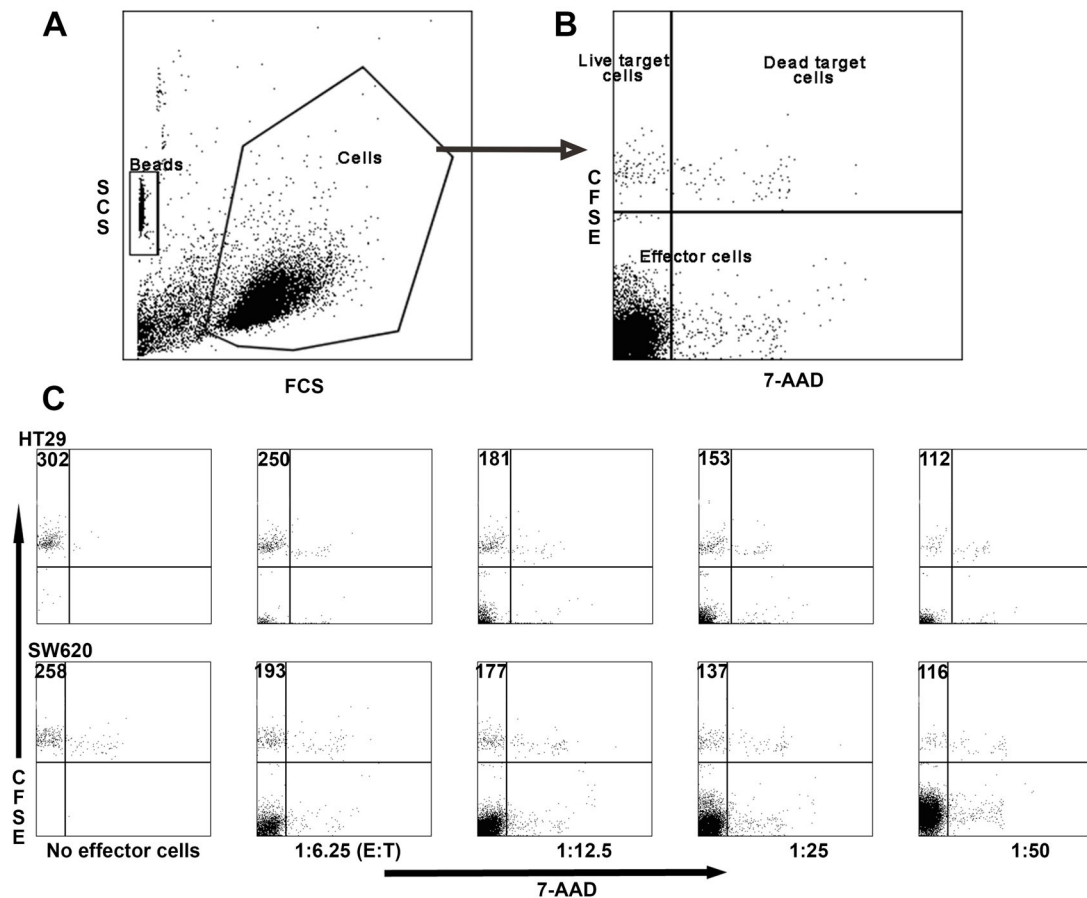

**Fig. 4.** Flow cytometric analysis of colon cancer cell killing by *in vitro* expanded V $\gamma$ 9V $\delta$ 2 T cells. Adherent target cells were detached with trypsin-EDTA, washed and stained with CFSE. V $\gamma$ 9V $\delta$ 2 T effector cells were obtained by stimulating PBMCs with 80 pM HMBPP and adding of IL-2 (25 U/ml) every second day, starting on day 3. The expanded  $\gamma\delta$  T cells were purified by negative selection using magnetic beads after 12 days in culture. Purified effector cells were incubated in 25 U IL-2/ml overnight, after which they were incubated with target cells for 4 h at 37°C. Beads were added as a counting reference and the dead cells were stained with 7-AAD. The cells were gated using the side and forward scatter dot plot (A). Note that most 7-AAD positive cells do not appear in the gated population since dead cells have altered forward and side scatter compared with the gated population. Live target cells were CFSE+ but 7AAD- (top left quadrant) and dying target cells were double positive (top right quadrant). (B) The effector cell populations are found in the lower left and right quadrants. (C) The effector to target cell ratio was varied between 6.25:1 and 50:1 and compared with a target-cell-free control. The number of live target cells is displayed.

is important since combined cancer therapy is showing encouraging results (Loskog et al., 2016; Mangsbo et al., 2010; Todaro et al., 2013a). However, in the presence of IL-21, V $\gamma$ 9V $\delta$ 2 T cells can develop into immunosuppressive Tregs (Barjon et al., 2017), emphasising that both the expansion conditions and the tumour microenvironment can influence the outcome of adoptive V $\gamma$ 9V $\delta$ 2 T cell transfer. Long-term *in vitro* expansion of V $\gamma$ 9V $\delta$ 2 T cells may also lead to activation-induced cell death, which can be reduced using vitamin C supplementation or antigen presenting cells expression ligands to CD80, CD83, 4-1BB, CD32, CD36, CD40 L and CD40 (Cho et al., 2015; Choi et al., 2021; Kouakanou et al., 2020).

For V $\gamma$ 9V $\delta$ 2 T cell immunotherapy by adoptive transfer of *ex vivo* expanded cells to be considered, it is critical that the patients' cells respond to stimulation and thus can be expanded. Our finding that supplementing media freshly thawed serum prevents the misclassification of responders as non-responders, argues that using freshly prepared medium should become the standard protocol for assessing V $\gamma$ 9V $\delta$ 2 T cell proliferation. Possibly in combination with thawing cryopreserved PBMCs in human albumin that was recently shown to improve V $\gamma$ 9V $\delta$ 2 T cell survival upon thawing (Burnham et al., 2021). The omission of

freshly thawed serum supplementation may explain the surprisingly large fraction of non-responders reported in some studies (Pettrini et al., 2011; Wilhelm et al., 2003), especially since the non-responders were present in the control group, whereas we found only responders among healthy donors after switching to medium supplemented with freshly thawed serum.

It was long believed that single isoprenoid unit diphosphates IPP and DMAPP were superior at activating V $\gamma$ 9V $\delta$ 2 T cells than their longer counterparts (Morita et al., 2007). However, it was later suggested that this only applies to V $\gamma$ 9V $\delta$ 2 T cell clones. When PBMCs were used as the starting material, isoprenoid diphosphates one to four isoprenoid units long resulted in comparable levels of proliferation (Gruenbacher et al., 2014). Our results corroborate this finding, but unlike Gruenbacher et al., we needed a higher GPP concentration to observe proliferation comparable to that of PBMCs stimulated by IPP, DMAPP, FPP and GGPP. This difference could be the result of us using a lower, more physiologically relevant, IL-2 concentration (Pullman and Doe, 1992), as well as our use of a more quantitative proliferation assay. Further emphasising the importance of the starting material, in V $\gamma$ 9V $\delta$ 2 T cell clones, IPP is more potent than DMAPP (Morita et al., 2001; 2007), whereas the opposite is true for PBMCs (Amslinger et al., 2007).

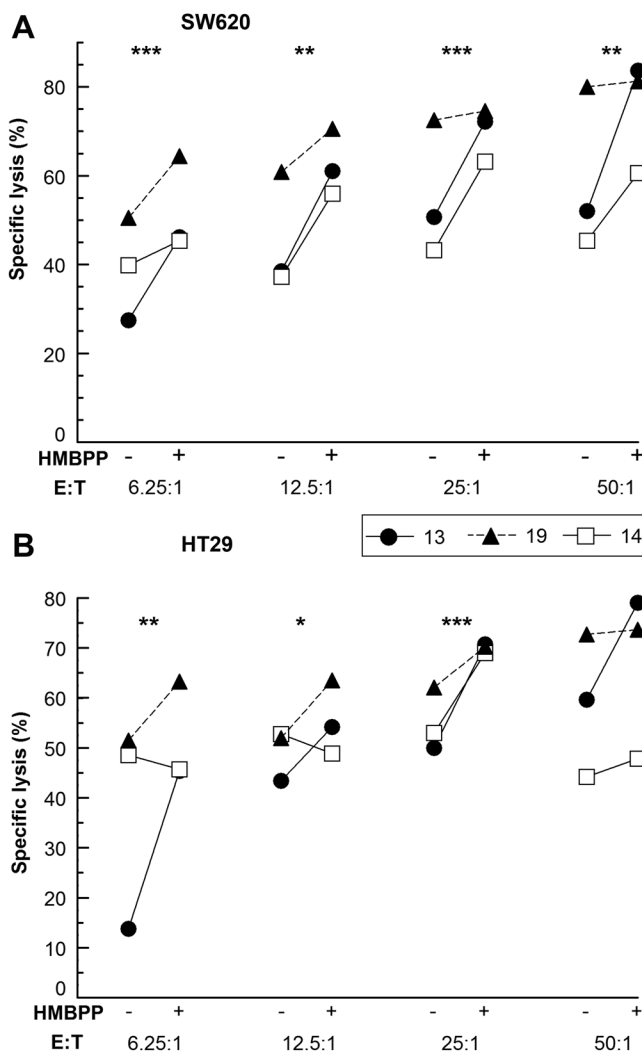

**Fig. 5. HMBPP enhances the cytotoxicity of *in vitro* expanded V $\gamma$ 9V $\delta$ 2 T cells towards colon cancer cells.** PBMCs, freshly prepared or cryopreserved, were seeded at  $1 \times 10^6$  live cells/ml and stimulated with 80 pM HMBPP. IL-2 (25 U/ml) was added every second day starting on day 3. Total  $\gamma\delta$  cells (effector cells, E) were purified by negative selection using magnetic beads after 11–12 days of culture. The purified effector cells (E) were incubated with (A) SW620 and (B) HT29 target (T) cells  $\pm$  80 pM HMBPP at different E:T ratios for 4 h at 37°C. Specific lysis was determined by flow cytometric analysis. The data shown are means from three biological replicates and stars indicate the statistical significance from an ANOVA for each E:T ratio.

Whether the longer isoprenoid diphosphates, like their shorter counterparts IPP and HMBPP, can bind to and cause a conformational change of BTN3A1 is unclear (Vavassori et al., 2013). An alternative to binding BTN3A1 is that they like aminobisphosphonates and alkylamines are indirect phosphoantigens that inhibit farnesyl diphosphate synthase, which leads to intracellular IPP accumulation.

We found that DMAP, but not the longer isoprenoid monophosphates, stimulated V $\gamma$ 9V $\delta$ 2 T cell proliferation from PBMCs at the same concentration as DMAPP. (*E*)-4-hydroxy-3-methyl-but-2-enyl phosphate (HMBP) from the 2-*C*-methyl-D-erythritol 4-phosphate pathway, has also been reported to support V $\gamma$ 9V $\delta$ 2 T cell proliferation from PBMCs, but with a potency about 1700 times lower than that of HMBPP, making the difference between the mono- and diphosphate bigger than for DMAP/DMAPP (Amstlinger et al., 2007). In V $\gamma$ 9V $\delta$ 2 T cell clones,

**Table 1. The accuracy of the V $\gamma$ 9V $\delta$ 2 T cell flow cytometry cytotoxicity method**

| Ratio  | Confidence interval for the fraction of dead cells (%) |
|--------|--------------------------------------------------------|
| 50:1   | Mean $\pm$ 6.9                                         |
| 25:1   | Mean $\pm$ 6.5                                         |
| 12.5:1 | Mean $\pm$ 7.5                                         |
| 6.25:1 | Mean $\pm$ 8.7                                         |

95% confidence intervals were calculated for the different E:T ratios from the means of three biological replicates with a pooled standard deviation. The pooled standard deviation was estimated for each E:T ratio with 27 or 30 observations, with a linear regression model with donor, treatment and cell type as explanatory variables and percentage dead cells as the dependent variable.

DMAP was found to be considerably more potent in stimulating proliferation than isopentenyl phosphate (IP), whereas the reverse was found for the corresponding diphosphates (Morita et al., 2001; Tanaka et al., 1995). Intriguingly isoprenoid monophosphates, unlike their diphosphate counterparts, are resistant to dephosphorylation by the ECTO-ATPase CD39 (Gruenbacher et al., 2016) and they therefore could be stable activators of V $\gamma$ 9V $\delta$ 2 T cells *in vivo*.

Isoprenoid alcohols are taken up by cells, probably more readily than their phosphorylated counterparts, and are incorporated into prenylated proteins by enzymes requiring phosphorylated substrates (Crick et al., 1997; Parmryd et al., 1999), i.e. they are converted to phosphoantigens intracellularly. Given that phosphoantigens are believed to be sensed intracellularly by the B30.2 domain of BTN3A1 (Sandstrom et al., 2014; Wang and Morita, 2015), it is surprising that the isoprenoid alcohols did not stimulate V $\gamma$ 9V $\delta$ 2 T cell proliferation. A possible explanation is that the phosphorylation of the alcohols does not occur in the compartment containing BTN3A1. However, protein prenylation takes place in the cytosol (Moores et al., 1991; Reiss et al., 1990; Yoshida et al., 1991), where BTN3A1 exposes its intracellular domain, so there could be an enzyme complex that channels the phosphorylated alcohols directly to the protein prenylation substrates, precluding their exposure to BTN3A1. Alternatively, higher concentrations of isoprenoid pyrophosphates may be required to achieve a conformational change of BTN3A1 than are required for protein prenylation. The concentration of phosphoantigen required to produce a conformational change of BTN3A1 remains to be established.

Despite the hazards of working with radiochemicals  $^{51}\text{Cr}$ -release assays are routinely used to assess cytotoxicity towards adherent target cells (Capietto et al., 2011; Fisher et al., 2014b; Wrobel et al., 2007). Replacing  $^{51}\text{Cr}$  with a non-radioactive label like CFSE eliminates this hazard, but neither approach can differentiate between live and dead cells. This means that the same quantitative response could have a range of biological explanations: a few cells being completely ruptured, many cells becoming slightly leaky or a mix of ruptured and leaky cells. For cells that grow in suspension, multiple FACS analysis methods for the assessment of cytotoxicity exist (Jedema et al., 2004; Kim et al., 2007; Sawaisorn et al., 2019), but for adherent cells a FACS approach is less common. We have demonstrated that FACS is also an excellent methodology for assessing V $\gamma$ 9V $\delta$ 2 T cell cytotoxicity towards adherent cells. Our method has two major advantages: it requires few cells, and it allows the exact quantification of the number of dead cells, including cells that disintegrate, by using beads as a counting reference. Accordingly, our method is a major improvement upon the bulk-release methods.

We found that HMBPP enhanced the cytotoxicity of V $\gamma$ 9V $\delta$ 2 T cells towards adherent colon cancer cells, which is in line with earlier findings with suspension target cells (Dunne et al., 2010). The most likely explanation for the enhancement is that HMBPP by activating the V $\gamma$ 9V $\delta$ 2 T cells stimulate the release of granula containing IFN- $\gamma$  and/or granzysin/perforin, both of which would promote cytotoxicity. The expansion protocol is also known to affect the cytotoxicity of V $\gamma$ 9V $\delta$ 2 T cells. Aminobisphosphonates, which cause the accumulation of phosphoantigens, leads to the proliferation of V $\gamma$ 9V $\delta$ 2 T cells with a cytotoxic phenotype when administered to colon cancer stem cells used to stimulate PBMCs *in vitro* (Zocchi et al., 2017). Chemotherapy has also been shown to prime cancer cells to killing by of V $\gamma$ 9V $\delta$ 2 T cells (Todaro et al., 2013b). Injection with aminobisphosphonates is also used in clinical trials in combination with IL-2 to induce the *in vivo* proliferation of cytotoxic V $\gamma$ 9V $\delta$ 2 T cells (Dieli et al., 2003). Adoptive cell transfer of *in vitro* expanded V $\gamma$ 9V $\delta$ 2 T cells may be a preferable approach however, since injections of aminobisphosphonates have been reported to be associated with the onset and/or worsening of inflammatory and autoimmune disorders (Markovits et al., 2017). A promising approach is targeting V $\gamma$ 9V $\delta$ 2 T cells to cancer cells using bispecific antibodies (Oberg et al., 2014). To optimise the proliferation as well as the cytotoxicity of V $\gamma$ 9V $\delta$ 2 T cells, a combination of these approaches may prove beneficial.

In conclusion, using our novel, quantitative flow cytometry method, the cytotoxicity of V $\gamma$ 9V $\delta$ 2 T cells towards adherent cells can be assessed with a straightforward interpretation at the single cell level. The crucial role for supplementation of freshly thawed serum when assessing V $\gamma$ 9V $\delta$ 2 T cell proliferation that we present will help to minimise misclassification as non-responders, which is important for testing patients for compatibility with V $\gamma$ 9V $\delta$ 2 T cell immunotherapy.

## MATERIALS AND METHODS

### Materials

RPMI 1640, DMEM, glutamine, EDTA-Trypsin (0.25%) and penicillin/streptomycin were from GE Healthcare HyClone (Logan, UT, USA). Human AB serum (HS) was from Lonza (Basel, Switzerland) or the blood centre at Uppsala University Hospital, Sweden. The antibodies anti-V $\delta$ 2-FITC (clone B6), anti-CD3-PE (clone UCHT1), anti-mouse IgG-PE (clone MOPC-21) and 7-amino-actinomycin D (7-AAD) were from BioLegend (San Diego, CA, USA). CFSE was from Invitrogen (Thermo Fisher Scientific, Waltham, MA, USA). Fetal bovine serum (FBS), Histopaque<sup>®</sup>-1077, isopentenol, *trans*-geraniol, all-*trans*-farnesol, dimethylallyl alcohol for isoprenoid phosphate synthesis and chemicals were from Sigma (St. Louis, MO, USA), unless otherwise indicated. HPLC-grade solvents were from Merck (Darmstadt, Germany). HMBPP was from Echelon Biosciences (Salt Lake City, UT, USA), dimethylallyl alcohol was from Isoprenoids (Tampa, FL) and all-*trans*-geranylgeraniol was from Santa Cruz Biotechnology (Dallas, TX). Heptaprenol was isolated from the wood of *Betula verrucosa* (Chojnacki et al., 1975). The IL-2 was a generous gift from Giampetro Corradin (Université de Lausanne, Switzerland).

### Ethical statement

This study was conducted in accordance with the principles expressed in the Declaration of Helsinki and was approved by the Ethical Review Boards in Stockholm (2007/823-31/2) and Uppsala (2011/850-32).

### Culture of cell lines

Both SW620 cells and HT29 cells were from ATCC, the latter via Dr. A. Blokzijl, Uppsala University. Both cell lines were cultured in DMEM supplemented with 10% FBS, 100 U/ml penicillin, 100  $\mu$ g/ml streptomycin and 2 mM glutamine (full media). The cell cultures tested negative for Mycoplasma infection, assessed using a PCR-based method (Uphoff and Drexler, 2011).

### Synthesis of isoprenoid mono- and diphosphates

Dimethylallyl and isopentenyl mono- and diphosphates were synthesised at the Collection of Polyprenols, Institution of Biochemistry and Biophysics (IBB), Polish Academy of Science (PAS) according to the large-scale method for allylic isoprenoid diphosphates (Davisson et al., 1985). The synthesis of all other isoprenoid mono- and diphosphates was performed at the Collection of Polyprenols, IBB, PAS according to the polyprenyl phosphate synthesis method (Danilov et al., 1989). Stock solutions of isoprenoids were kept in 0.15 M NH<sub>3</sub>:EtOH (1:1, v/v).

### PBMC preparation

Buffy coats from healthy donors were obtained from the Blood Central at Uppsala University Hospital. Peripheral blood mononuclear cells (PBMCs) were prepared using Histopaque<sup>®</sup>-1077. The PBMCs were washed twice in ice-cold RPMI-1640. For cryopreservation at  $-80^{\circ}\text{C}$ , the PBMCs were suspended at  $10\text{--}20\times 10^6/\text{ml}$  in RPMI-1640 freshly supplemented with 10% human AB-serum, 100 U/ml penicillin, 100  $\mu$ g/ml streptomycin and 2 mM glutamine and 10% DMSO. The PBMCs were stored at  $-80^{\circ}\text{C}$  for periods up to 8 months.

### V $\gamma$ 9V $\delta$ 2 T cell proliferation

Cryopreserved PBMCs were thawed quickly in a water bath at  $37^{\circ}\text{C}$  and washed twice in RPMI-1640. Both cryopreserved and freshly isolated PBMCs were suspended at  $1\times 10^6$  live cells/ml in RPMI-1640 supplemented with 5% human AB-serum, 100 U/ml penicillin, 100  $\mu$ g/ml streptomycin, 25 mM HEPES and 2 mM glutamine (complete medium). All isoprenoids except HMBPP were added from 1.4–25 mM stocks in NH<sub>4</sub>:EtOH (1:1) to the bottom of wells in 24-well plates. HMBPP was added from a freshly prepared 80 nM solution in NH<sub>4</sub>:EtOH (1:1). The solvent was allowed to evaporate before cells at  $1\times 10^6/\text{ml}$  in complete RPMI-1640 were added. The final HMBPP concentration was 80 pM and the final concentrations of all other isoprenoids was 25  $\mu$ M. DMSO (0.1–2.5%) was added to the culture vials before the addition of cells where indicated. The cells were cultured at  $37^{\circ}\text{C}$  in 5% CO<sub>2</sub> in a humidified atmosphere (LabRum, Stockholm, Sweden). At days 3, 5 and 7, 25 U/ml IL-2 was added when proliferation was to be assessed. IL-2 was also added on day 9, when the cells were assessed for their cytotoxicity. On day 7, 200  $\mu$ l complete medium was added to all samples. The cells were harvested on days 10–11.

### Purification of $\gamma\delta$ T cells

The expanded  $\gamma\delta$  T cells were isolated using a negative selection TCR  $\gamma\delta$ + T cell isolation kit according to the instructions of the manufacturer (Miltenyi Biotec GmbH, Gladbach, Germany). The purified cells were incubated at  $1\times 10^6/\text{ml}$  in complete media supplemented with 25 U/ml IL-2 at  $37^{\circ}\text{C}$  in 5% CO<sub>2</sub> in a humidified atmosphere overnight. The purified cells were assessed by flow cytometry and contained  $\geq 90\%$  V $\delta$ 2 T cells.

### Cytotoxicity assay

SW620 and HT29 cells in T25 flasks were washed in PBS and incubated with 1 ml EDTA-Trypsin for 5 min at  $37^{\circ}\text{C}$ . The detached cells were counted using a Countess Automated Cell Counter (Invitrogen, Carlsbad, CA, USA) and suspended at  $1\times 10^6/\text{ml}$  in full media. The target cells were labelled with 2  $\mu$ M CFSE in PBS at  $37^{\circ}\text{C}$  in the dark for 20–25 min, after which they were washed once in 10 mL PBS and suspended at  $1\times 10^5/\text{ml}$  in full media. 25  $\mu$ L of the target cell suspension was added per well of 96-well polystyrene plates (VWR, Radnor, PA, USA). The effector V $\delta$ 2+ T cells were washed once, resuspended in complete media at  $5\times 10^6/\text{ml}$  and added to the wells at effector to target cells ratios of 50:1, 25:1, 12.5:1 and 6.25:1 or 27:1, 9:1, 3:1 and 1:1. The total volume was adjusted to 50  $\mu$ l in all wells and the cell mixes were incubated at  $37^{\circ}\text{C}$  for 4 h. The cell mixtures were then transferred to Falcon round-bottom polystyrene tubes (Corning, NY) and kept on ice. 0.125  $\mu$ g 7-AAD from a 50  $\mu$ g/ml stock in PBS with sodium azide [final concentration 0.00075% (w/v)] and a constant volume (containing around 20,000) of Calibrite beads (BD Biosciences, San Jose, CA) were added to each tube. The samples were analysed by flow cytometry after a minimum of 5 and maximum of 60 min on ice. The beads were used as a counting reference and the flow cytometry was stopped once the number of beads reached a pre-set count.

The number of cells killed=the number of live cells in the no effector cells control – the number of live cells remaining in the experimental group.

Specific lysis=the number of cells killed/the number of live cells in the no effector cells control.

### Proliferation assay

For the estimation of V $\gamma$ 9V $\delta$ 2 T cell proliferation, the cell density in the stimulated PBMC cultures was determined and their volumes were estimated using pipettes. A FACSCalibur (BD Biosciences, San Jose, CA, USA) was used to determine the percentage of V $\delta$ 2+CD3+ cells in the initial PBMCs and the stimulated PBMC cultures. The fraction of V $\delta$ 2+ cells out of the total CD3+ cells for the donors used in this study are listed in Table S1. Proliferation was defined as the ratio of the number of V $\delta$ 2+ T cells on days 10-11 to the number of V $\delta$ 2+ T cells on day 0. Relative proliferation was defined as the proliferation of the sample with the proliferation of the IL-2 only control subtracted. The cell numbers were obtained by multiplying the percentage of V $\delta$ 2+ T cells by the volume of the sample. The isotype control confirmed that there was no unspecific staining. Data analysis was performed using FlowJo (Tree Star Inc., Ashland, OR, USA).

### Microscopy

To assess cell adherence in the polystyrene wells a Nikon Eclipse TE2000 inverted microscope (Nikon, Tokyo, Japan) equipped with 20 $\times$  air objective and a Nikon camera was used.

### Statistics

10-logarithmic transformed data were used for the statistical calculations of proliferation. The data were tested for normality using the Shapiro–Wilk test and normality could not be rejected. No substantial heteroscedasticity was found. For the proliferation data where one variable at the time were compared, a paired *t*-test of the means for two biological replicates for each condition was used. The experiments with DMSO were evaluated with a linear statistical model based on 84 observations from 11 donors with freshly prepared/cryopreserved, with/without added DMSO, donors and the experimental date as explanatory factors. The response variable in the model was relative proliferation after 10-logarithmic transformation. For each ratio of the cytotoxicity measurements, an analysis of variance (ANOVA) model was used with donor and HMBPP or donor, HMBPP and DMSO as explanatory factors. For the cytotoxicity methods, 95% confidence intervals were calculated for the different E:T ratios from the means of three biological replicates with a pooled standard deviation. The pooled standard deviation was estimated for each E:T ratio with 27 or 30 observations with a linear regression model with donor, treatment and cell type as explanatory variables and percentage dead cells as the dependent variable. No data were excluded from the statistical analysis. The cut-off values for statistical significance were defined as \**P*<0.05, \*\**P*<0.01 and \*\*\**P*<0.001.

### Acknowledgements

We are indebted to Assoc. Prof. Giampietro Corradin for the generous gift of IL-2, grateful to Dr. Andries Blokzijl for the HT29 cells and thankful to all blood donors. We thank Dr. Jeremy Adler for assistance with figure preparation, Dr. Jan Saras for setting up the mycoplasma assay and the Collection of Polyrenols, IBB, PAS for financial support.

### Competing interests

The authors declare no competing or financial interests.

### Funding

This study was supported by grants to I.P. from the Swedish Research Council [Dnr 2010-3258] and AFA Insurance.

### Data availability statement

The raw data will be made available upon reasonable request.

### Author contributions

Conceptualization: C.L., I.P.; Methodology: C.L., S.G.E., I.P.; Validation: C.L.; Formal analysis: C.L., S.G.E., I.P.; Investigation: C.L.; Resources: K.S.T.; Writing - original draft: C.L., I.P.; Writing - review & editing: C.L., K.S.T., S.G.E., I.P.; Visualization: C.L., I.P.; Supervision: I.P.; Project administration: I.P.; Funding acquisition: I.P.

### References

- Amslinger, S., Hecht, S., Rohdich, F., Eisenreich, W., Adam, P., Bacher, A. and Bauer, S. (2007). Stimulation of V $\gamma$ 9/V $\delta$ 2 T-lymphocyte proliferation by the isoprenoid precursor, (E)-1-hydroxy-2-methyl-but-2-enyl 4-diphosphate. *Immunobiology* **212**, 47-55. doi:10.1016/j.imbio.2006.08.003
- Andreu-Ballester, J. C., Garcia-Ballesteros, C., Benet-Campos, C., Amigo, V., Almela-Quilis, A., Mayans, J. and Ballester, F. (2012). Values for  $\alpha\beta$  and  $\gamma\delta$  T-lymphocytes and CD4+, CD8+, and CD56+ subsets in healthy adult subjects: assessment by age and gender. *Cytometry B Clin. Cytom* **82**, 238-244. doi:10.1002/cyto.b.21020
- Angelini, D. F., Borsellino, G., Poupot, M., Diamantini, A., Poupot, R., Bernardi, G., Poccia, F., Fournié, J.-J. and Battistini, L. (2004). Fc $\gamma$ RIII discriminates between 2 subsets of V $\gamma$ 9V $\delta$ 2 effector cells with different responses and activation pathways. *Blood* **104**, 1801-1807. doi:10.1182/blood-2004-01-0331
- Barjon, C., Michaud, H.-A., Fages, A., Dejou, C., Zampieri, A., They, L., Gennetier, A., Sanchez, F., Gros, L., Eliaou, J.-F. et al. (2017). IL-21 promotes the development of a CD73-positive V $\gamma$ 9V $\delta$ 2 T cell regulatory population. *Oncoimmunology* **7**, e1379642. doi:10.1080/21624402.2017.1379642
- Brandes, M., Willmann, K. and Moser, B. (2005). Professional antigen-presentation function by human  $\gamma\delta$  T Cells. *Science* **309**, 264-268. doi:10.1126/science.1110267
- Brandes, M., Willmann, K., Bioley, G., Levy, N., Eberl, M., Luo, M., Tampe, R., Levy, F., Romero, P. and Moser, B. (2009). Cross-presenting human  $\gamma\delta$  T cells induce robust CD8+  $\alpha\beta$  T cell responses. *Proc. Natl. Acad. Sci. U.S.A.* **106**, 2307-2312. doi:10.1073/pnas.0810059106
- Burk, M. R., Mori, L. and De Libero, G. (1995). Human V $\gamma$ 9-V $\delta$ 2 cells are stimulated in a cross-reactive fashion by a variety of phosphorylated metabolites. *Eur. J. Immunol.* **25**, 2052-2058. doi:10.1002/eji.1830250737
- Burnham, R. E., Tope, D., Branella, G., Williams, E., Doering, C. B. and Spencer, H. T. (2021). Human serum albumin and chromatin condensation rescue ex vivo expanded  $\gamma\delta$  T cells from the effects of cryopreservation. *Cryobiology* **99**, 78-87. doi:10.1016/j.cryobiol.2021.01.011
- Cabillic, F., Toutirais, O., Lavoue, V., de La Pintiére, C. T., Daniel, P., Rioux-Leclerc, N., Turlin, B., Monkkonen, H., Monkkonen, J., Boudjema, K. et al. (2010). Aminobisphosphonate-pretreated dendritic cells trigger successful V $\gamma$ 9V $\delta$ 2 T cell amplification for immunotherapy in advanced cancer patients. *Cancer Immunol. Immunother.* **59**, 1611-1619. doi:10.1007/s00262-010-0887-0
- Capietto, A. H., Martinet, L. and Fournie, J.-J. (2011). Stimulated  $\gamma\delta$  T cells increase the in vivo efficacy of Trastuzumab in HER-2+ breast cancer. *J. Immunol.* **187**, 1031-1038. doi:10.4049/jimmunol.1100681
- Cho, H. W., Kim, S. Y., Sohn, D. H., Lee, M. J., Park, M. Y., Sohn, H. J., Cho, H. I. and Kim, T. G. (2015). Triple costimulation via CD80, 4-1BB, and CD83 ligand elicits the long-term growth of V $\gamma$ 9V $\delta$ 2 T cells in low levels of IL-2. *J. Leukoc. Biol.* **99**, 521-529. doi:10.1189/jlb.1H10814-409RR
- Choi, H., Lee, Y., Hur, G., Lee, S. E., Cho, H. I., Sohn, H. J., Cho, B. S., Kim, H. J. and Kim, T. G. (2021).  $\gamma\delta$  T cells cultured with artificial antigen-presenting cells and IL-2 show long-term proliferation and enhanced effector functions compared with  $\gamma\delta$  T cells cultured with only IL-2 after stimulation with zoledronic acid. *Cytotherapy* **23**, 908-917. doi:10.1016/j.cyt.2021.06.002
- Chojnacki, T., Jankowski, W., Mańkowski, T. and Sasak, W. (1975). Preparative separation of naturally occurring mixtures of polyrenols on hydroxyalkoxypropyl-Sephadex. *Anal. Biochem.* **69**, 114-119. doi:10.1016/0003-2697(75)90572-2
- Cosan, F., Aktas Cetin, E., Akdeniz, N., Emrence, Z., Cefle, A. and Deniz, G. (2017). Natural killer cell subsets and their functional activity in Behcet's disease. *Immunol. Investig.* **46**, 419-432. doi:10.1080/08820139.2017.1288240
- Crick, D. C., Andres, D. A. and Waechter, C. J. (1997). Novel salvage pathway utilizing farnesol and geranylgeraniol for protein isoprenylation. *Biochem. Biophys. Res. Commun.* **237**, 483-487. doi:10.1006/bbrc.1997.7145
- Danilov, L. L., Druzhinina, T. N., Kalinchuk, N. A., Maltsev, S. D. and Shibaev, V. N. (1989). Polyrenyl phosphates: synthesis and structure-activity relationship for a biosynthetic system of Salmonella anatum O-specific polysaccharide. *Chem. Phys. Lipids.* **51**, 191-203. doi:10.1016/0009-3084(89)90006-6
- Das, H., Wang, L., Kamath, A. and Bukowski, J. F. (2001). V $\gamma$ 2V $\delta$ 2 T-cell receptor-mediated recognition of aminobisphosphonates. *Blood* **98**, 1616-1618. doi:10.1182/blood.V98.5.1616
- Davisson, V. J., Woodside, A. B. and Poulter, C. D. (1985). Synthesis of allylic and homoallylic isoprenoid pyrophosphates. *Methods Enzymol.* **110**, 130-144. doi:10.1016/S0076-6879(85)10068-6
- Dieli, F., Gebbia, N., Poccia, F., Caccamo, N., Montesano, C., Fulfarò, F., Arcara, C., Valerio, M. R., Meraviglia, S., Di Sano, C. et al. (2003). Induction of  $\gamma\delta$  T-lymphocyte effector functions by bisphosphonate zoledronic acid in cancer patients in vivo. *Blood* **102**, 2310-2311. doi:10.1182/blood-2003-05-1655
- Dunne, M. R., Madrigal-Estebas, L., Tobin, L. M. and Doherty, D. G. (2010). (E)-4-hydroxy-3-methyl-but-2-enyl pyrophosphate-stimulated V $\gamma$ 9V $\delta$ 2 T cells possess T helper type 1-promoting adjuvant activity for human monocyte-derived dendritic cells. *Cancer Immunol. Immunother.* **59**, 1109-1120. doi:10.1007/s00262-010-0839-8



- Fisher, J. P., Heuveljans, J., Yan, M., Gustafsson, K. and Anderson, J. (2014a).  $\gamma\delta$  T cells for cancer immunotherapy: A systematic review of clinical trials. *Oncoimmunology* **3**, e27572. doi:10.4161/onci.27572
- Fisher, J. P., Yan, M., Heuveljans, J., Carter, L., Abolhassani, A., Frosch, J., Wallace, R., Flutter, B., Capsomidis, A., Hubank, M. et al. (2014b). Neuroblastoma killing properties of V $\delta$ 2 and V $\delta$ 2-negative  $\gamma\delta$ T cells following expansion by artificial antigen-presenting cells. *Clinical Cancer Research: an official journal of the American Association for Cancer Research* **20**, 5720-5732. doi:10.1158/1078-0432.CCR-13-3464
- Fowler, D. W. and Bodman-Smith, M. D. (2015). Harnessing the power of V $\delta$ 2 cells in cancer immunotherapy. *Clin. Exp. Immunol.* **180**, 1-10. doi:10.1111/cei.12564
- Gaafar, A., Aljurf, M. D., Al-Sulaiman, A., Iqniebi, A., Manogaran, P. S., Mohamed, G. E., Al-Sayed, A., Alzahrani, H., Alsharif, F., Mohareb, F. et al. (2009). Defective  $\gamma\delta$  T-cell function and granzyme B gene polymorphism in a cohort of newly diagnosed breast cancer patients. *Exp. Hematol.* **37**, 838-848. doi:10.1016/j.exphem.2009.04.003
- Gertner, J., Wiedemann, A., Poupot, M. and Fournie, J. J. (2007). Human  $\gamma\delta$  T lymphocytes strip and kill tumor cells simultaneously. *Immunol. Lett.* **110**, 42-53. doi:10.1016/j.imlet.2007.03.002
- Gossman, W. and Oldfield, E. (2002). Quantitative structure-activity relations for  $\gamma\delta$  T cell activation by phosphoantigens. *J. Med. Chem.* **45**, 4868-4874. doi:10.1021/jm020224n
- Gottesman, M. M., Fojo, T. and Bates, S. E. (2002). Multidrug resistance in cancer: role of ATP-dependent transporters. *Nat. Rev. Cancer* **2**, 48-58. doi:10.1038/nrc706
- Gruenbacher, G. and Thurnher, M. (2015). Mevalonate metabolism in cancer. *Cancer Lett.* **356**, 192-196. doi:10.1016/j.canlet.2014.01.013
- Gruenbacher, G., Nussbaumer, O., Gander, H., Steiner, B., Leonhartsberger, N. and Thurnher, M. (2014). Stress-related and homeostatic cytokines regulate V $\gamma$ 9V $\delta$ 2 T-cell surveillance of mevalonate metabolism. *Oncoimmunology* **3**, e953410. doi:10.4161/21624011.2014.953410
- Gruenbacher, G., Gander, H., Rahm, A., Idzko, M., Nussbaumer, O. and Thurnher, M. (2016). Ecto-ATPase CD39 Inactivates isoprenoid-derived V $\gamma$ 9V $\delta$ 2 T cell phosphoantigens. *Cell Rep* **16**, 444-456. doi:10.1016/j.celrep.2016.06.009
- Gu, S., Sachleben, J. R., Boughter, C. T., Nawrocka, W. I., Borowski, M. T., Tarrasch, J. T., Skiniotis, G., Roux, B. and Adams, E. J. (2017). Phosphoantigen-induced conformational change of butyrophilin 3A1 (BTN3A1) and its implication on V $\gamma$ 9V $\delta$ 2 T cell activation. *Proc. Natl. Acad. Sci. U.S.A.* **114**, E7311-E7320. doi:10.1073/pnas.1707547114
- Harly, C., Guillaume, Y., Nedellec, S., Peigne, C. M., Monkkonen, H., Monkkonen, J., Li, J., Kuball, J., Adams, E. J., Netzer, S. et al. (2012). Key implication of CD277/butyrophilin-3 (BTN3A) in cellular stress sensing by a major human  $\gamma\delta$  T-cell subset. *Blood* **120**, 2269-2279. doi:10.1182/blood-2012-05-430470
- Heeneman, S., Deutz, N. E. and Buurman, W. A. (1993). The concentrations of glutamine and ammonia in commercially available cell culture media. *J. Immunol. Methods* **166**, 85-91. doi:10.1016/0022-1759(93)90331-Z
- Hintz, M., Reichenberg, A., Altincicek, B., Bahr, U., Gschwind, R. M., Kollas, A. K., Beck, E., Wiesner, J., Eberl, M. and Jomaa, H. (2001). Identification of (E)-4-hydroxy-3-methyl-but-2-enyl pyrophosphate as a major activator for human  $\gamma\delta$  T cells in *Escherichia coli*. *FEBS Lett.* **509**, 317-322. doi:10.1016/S0014-5793(01)03191-X
- Jedema, I., van der Werff, N. M., Barge, R. M., Willemze, R. and Falkenburg, J. H. (2004). New CFSE-based assay to determine susceptibility to lysis by cytotoxic T cells of leukemic precursor cells within a heterogeneous target cell population. *Blood* **103**, 2677-2682. doi:10.1182/blood-2003-06-2070
- Jomaa, H., Feurle, J., Luhs, K., Kunzmann, V., Tony, H. P., Herderich, M. and Wilhelm, M. (1999). V $\gamma$ 9/V $\delta$ 2 T cell activation induced by bacterial low molecular mass compounds depends on the 1-deoxy-D-xylulose 5-phosphate pathway of isoprenoid biosynthesis. *FEMS Immunol. Med. Microbiol.* **25**, 371-378.
- Kilcollins, A. M., Li, J., Hsiao, C.-H. and Wiemer, A. J. (2016). HMBPP analog prodrugs bypass energy-dependent uptake to promote efficient BTN3A1-mediated malignant Cell Lysis by V $\gamma$ 9V $\delta$ 2 T lymphocyte effectors. *J. Immunol.* **197**, 419-428. doi:10.4049/jimmunol.1501833
- Kim, G. G., Donnenberg, V. S., Donnenberg, A. D., Gooding, W. and Whiteside, T. L. (2007). A novel multiparametric flow cytometry-based cytotoxicity assay simultaneously immunophenotypes effector cells: comparisons to a 4 h 51Cr-release assay. *J. Immunol. Methods* **325**, 51-66. doi:10.1016/j.jim.2007.05.013
- Kouakanou, L., Xu, Y., Peters, C., He, J., Wu, Y., Yin, Z. and Kabelitz, D. (2020). Vitamin C promotes the proliferation and effector functions of human  $\gamma\delta$  T cells. *Cell. Mol. Immunol.* **17**, 462-473. doi:10.1038/s41423-019-0247-8
- Lecoeur, H., F evrier, M., Garcia, S., Riviere, Y. and Gougeon, M.-L. (2001). A novel flow cytometric assay for quantitation and multiparametric characterization of cell-mediated cytotoxicity. *J. Immunol. Methods* **253**, 177-187. doi:10.1016/S0022-1759(01)00359-3
- Lisowska, H., Deperas-Kaminska, M., Haghdoost, S., Parmryd, I. and Wojcik, A. (2010). Radiation-induced DNA damage and repair in human  $\gamma\delta$  and  $\alpha\beta$  T-lymphocytes analysed by the alkaline comet assay. *Genome Integr* **1**, 8. doi:10.1186/2041-9414-1-8
- Liu, C., Emami, S. N., Pettersson, J., Ranford-Cartwright, L., Faye, I. and Parmryd, I. (2018). V $\gamma$ 9V $\delta$ 2 T cells proliferate in response to phosphoantigens released from erythrocytes infected with asexual and gametocyte stage *Plasmodium falciparum*. *Cell. Immunol.* **334**, 11-19. doi:10.1016/j.cellimm.2018.08.010
- Loskog, A., Maleka, A., Mangsbo, S., Svensson, E., Lundberg, C., Nilsson, A., Krause, J., Agnarsdottir, M., Sundin, A., Ahlstrom, H. et al. (2016). Immunostimulatory AdCD40L gene therapy combined with low-dose cyclophosphamide in metastatic melanoma patients. *Br. J. Cancer* **114**, 872-880. doi:10.1038/bjc.2016.42
- Mangsbo, S. M., Sandin, L. C., Anger, K., Korman, A. J., Loskog, A. and Totterman, T. H. (2010). Enhanced tumor eradication by combining CTLA-4 or PD-1 blockade with CpG therapy. *J. Immunother.* **33**, 225-235. doi:10.1097/CJ.I.0b013e3181c01fcb
- Markovits, N., Loebstein, R. and Bank, I. (2017). Immune-mediated syndromes following intravenous bisphosphonate therapy. *Inflammopharmacology* **25**, 665-671. doi:10.1007/s10787-017-0365-9
- Moore, S. L., Schaber, M. D., Mosser, S. D., Rands, E., O'Hara, M. B., Garsky, V. M., Marshall, M. S., Pompiano, D. L. and Gibbs, J. B. (1991). Sequence dependence of protein isoprenylation. *J. Biol. Chem.* **266**, 14603-14610. doi:10.1016/S0021-9258(18)98729-6
- Morita, C. T., Lee, H. K., Wang, H., Li, H., Mariuzza, R. A. and Tanaka, Y. (2001). Structural features of nonpeptide prenyl pyrophosphates that determine their antigenicity for human  $\gamma\delta$  T cells. *J. Immunol.* **167**, 36-41. doi:10.4049/jimmunol.167.1.36
- Morita, C. T., Jin, C., Sarikonda, G. and Wang, H. (2007). Nonpeptide antigens, presentation mechanisms, and immunological memory of human V $\gamma$ 2V $\delta$ 2 T cells: discriminating friend from foe through the recognition of prenyl pyrophosphate antigens. *Immunol. Rev.* **215**, 59-76. doi:10.1111/j.1600-065X.2006.00479.x
- Nakajima, J., Murakawa, T., Fukami, T., Goto, S., Kaneko, T., Yoshida, Y., Takamoto, S. and Kakimi, K. (2010). A phase I study of adoptive immunotherapy for recurrent non-small-cell lung cancer patients with autologous  $\gamma\delta$  T cells. *Eur. J. Cardiothorac. Surg.* **37**, 1191-1197. doi:10.1016/j.ejcts.2009.11.051
- Oberg, H.-H., Peipp, M., Kellner, C., Sebens, S., Krause, S., Petrick, D., Adam-Klages, S., Rocken, C., Becker, T., Vogel, I. et al. (2014). Novel bispecific antibodies increase  $\gamma\delta$  T-cell cytotoxicity against pancreatic cancer cells. *Cancer Res.* **74**, 1349-1360. doi:10.1158/0008-5472.CAN-13-0675
- Parmryd, I., Andersson, B. and Dallner, G. (1999). Protein prenylation in spinach chloroplasts. *Proc. Natl. Acad. Sci. U.S.A.* **96**, 10074-10079. doi:10.1073/pnas.96.18.10074
- Petrini, I., Pacini, S., Galimberti, S., Taddei, M. R., Romanini, A. and Petrini, M. (2011). Impaired function of gamma-delta lymphocytes in melanoma patients. *Eur. J. Clin. Invest.* **41**, 1186-1194. doi:10.1111/j.1365-2362.2011.02524.x
- Puan, K. J., Low, J. S., Tan, T. W., Wee, J. T., Tan, E. H., Fong, K. W., Chua, E. T., Jin, C., Giner, J. L., Morita, C. T. et al. (2009). Phenotypic and functional alterations of V $\gamma$ 2V $\delta$ 2 T cell subsets in patients with active nasopharyngeal carcinoma. *Cancer Immunol. Immunother.* **58**, 1095-1107. doi:10.1007/s00262-008-0629-8
- Pullman, W. E. and Doe, W. F. (1992). IL-2 production by intestinal lamina propria cells in normal inflamed and cancer-bearing colons. *Clin. Exp. Immunol.* **88**, 132-137. doi:10.1111/j.1365-2249.1992.tb03052.x
- Reiss, Y., Goldstein, J. L., Seabra, M. C., Casey, P. J. and Brown, M. S. (1990). Inhibition of purified p21ras farnesyl:protein transferase by Cys-AAAX tetrapeptides. *Cell* **62**, 81-88. doi:10.1016/0092-8674(90)90242-7
- Saitoh, A., Narita, M., Watanabe, N., Tochiki, N., Satoh, N., Takizawa, J., Furukawa, T., Toba, K., Aizawa, Y., Shinada, S. et al. (2008). Anti-tumor cytotoxicity of  $\gamma\delta$  T cells expanded from peripheral blood cells of patients with myeloma and lymphoma. *Med. Oncol.* **25**, 137-147. doi:10.1007/s12032-007-9004-4
- Sandstrom, A., Peigne, C.-M., Leger, A., Crooks, J. E., Konczak, F., Gesnel, M.-C., Breathnach, R., Bonneville, M., Scotet, E. and Adams, E. J. (2014). The intracellular B30.2 domain of butyrophilin 3A1 binds phosphoantigens to mediate activation of human V $\gamma$ 9V $\delta$ 2 T cells. *Immunity* **40**, 490-500. doi:10.1016/j.immuni.2014.03.003
- Sawaisorn, P., Tangchaikere, T., Chan-On, W., Leepiyasakulchai, C., Udomsangpetch, R., Hongeng, S. and Jangpatarapongsa, K. (2019). Antigen-presenting cell characteristics of Human  $\gamma\delta$  T lymphocytes in chronic myeloid leukemia. *Immunol. Investig.* **48**, 11-26. doi:10.1080/08820139.2018.1529039
- Siegers, G. M., Ribot, E. J., Keating, A. and Foster, P. J. (2012). Extensive expansion of primary human  $\gamma\delta$  T cells generates cytotoxic effector memory cells that can be labeled with Feraheme for cellular MRI. *Cancer Immunol. Immunother.* **3**, 571-583. doi:10.1007/s00262-012-1353-y
- Tan, C. T., Wistuba-Hamprecht, K., Xu, W., Nyunt, M. S., Vasudev, A., Lee, B. T., Pawelec, G., Puan, K. J., Rotzschke, O., Ng, T. P. et al. (2016). V $\delta$ 2+ and  $\alpha$ ss T cells show divergent trajectories during human aging. *Oncotarget.* **29**, 44906-44918. doi:10.18632/oncotarget.10096
- Tanaka, Y., Morita, C. T., Nieves, E., Brenner, M. B. and Bloom, B. R. (1995). Natural and synthetic non-peptide antigens recognized by human  $\gamma\delta$  T cells. *Nature* **375**, 155-158. doi:10.1038/375155a0

- Thompson, K., Rojas-Navea, J. and Rogers, M. J. (2006). Alkylamines cause V $\gamma$ 9V $\delta$ 2 T-cell activation and proliferation by inhibiting the mevalonate pathway. *Blood* **107**, 651-654. doi:10.1182/blood-2005-03-1025
- Todaro, M., Meraviglia, S., Caccamo, N., Stassi, G. and Dieli, F. (2013a). Combining conventional chemotherapy and  $\gamma\delta$  T cell-based immunotherapy to target cancer-initiating cells. *Oncoimmunology* **2**, e25821. doi:10.4161/onci.25821
- Todaro, M., Orlando, V., Cicero, G., Caccamo, N., Meraviglia, S., Stassi, G. and Dieli, F. (2013b). Chemotherapy sensitizes colon cancer initiating cells to V $\gamma$ 9V $\delta$ 2 T cell-mediated cytotoxicity. *PLoS One* **8**, e65145. doi:10.1371/journal.pone.0065145
- Toia, F., Buccheri, S., Anfosso, A., Moschella, F., Dieli, F., Meraviglia, S. and Cordova, A. (2016). Skewed differentiation of circulating V $\gamma$ 9V $\delta$ 2 T lymphocytes in melanoma and impact on clinical outcome. *PLoS One* **11**, e0149570. doi:10.1371/journal.pone.0149570
- Uphoff, C. C. and Drexler, H. G. (2011). Detecting mycoplasma contamination in cell cultures by polymerase chain reaction. *Methods Mol. Biol.* **731**, 93-103. doi:10.1007/978-1-61779-080-5\_8
- Van Acker, H. H., Anguille, S., Willemen, Y., Van den Bergh, J. M., Berneman, Z. N., Lion, E., Smits, E. L. and Van Tendeloo, V. F. (2016). Interleukin-15 enhances the proliferation, stimulatory phenotype, and antitumor effector functions of human  $\gamma\delta$  T cells. *J Hematol Oncol* **9**, 101. doi:10.1186/s13045-016-0329-3
- van Beek, E., Pieterman, E., Cohen, L., Lowik, C. and Papapoulos, S. (1999). Farnesyl pyrophosphate synthase is the molecular target of nitrogen-containing bisphosphonates. *Biochem. Biophys. Res. Commun.* **264**, 108-111. doi:10.1006/bbrc.1999.1499
- Vavassori, S., Kumar, A., Wan, G. S., Ramanjaneyulu, G. S., Cavallari, M., El Daker, S., Beddoe, T., Theodossis, A., Williams, N. K., Gostick, E. et al. (2013). Butyrophilin 3A1 binds phosphorylated antigens and stimulates human  $\gamma\delta$  T cells. *Nat. Immunol.* **14**, 908-916. doi:10.1038/ni.2665
- Wada, I., Matsushita, H., Noji, S., Mori, K., Yamashita, H., Nomura, S., Shimizu, N., Seto, Y. and Kakimi, K. (2014). Intraperitoneal injection of in vitro expanded V $\gamma$ 9V $\delta$ 2 T cells together with zoledronate for the treatment of malignant ascites due to gastric cancer. *Cancer medicine* **3**, 362-375. doi:10.1002/cam4.196
- Wang, H. and Morita, C. T. (2015). Sensor Function for Butyrophilin 3A1 in Prenyl Pyrophosphate Stimulation of Human V $\gamma$ 2V $\delta$ 2 T Cells. *J. Immunol.* **195**, 4583-4594. doi:10.4049/jimmunol.1500314
- Wilhelm, M., Kunzmann, V., Eckstein, S., Reimer, P., Weissinger, F., Ruediger, T. and Tony, H.-P. (2003).  $\gamma\delta$  T cells for immune therapy of patients with lymphoid malignancies. *Blood* **102**, 200-206. doi:10.1182/blood-2002-12-3665
- Wrobel, P., Shojaei, H., Schitteck, B., Gieseler, F., Wollenberg, B., Kalthoff, H., Kabelitz, D. and Wesch, D. (2007). Lysis of a broad range of epithelial tumour cells by human  $\gamma\delta$  T cells: involvement of NKG2D ligands and T-cell receptor-versus NKG2D-dependent recognition. *Scand. J. Immunol.* **66**, 320-328. doi:10.1111/j.1365-3083.2007.01963.x
- Yang, Y., Li, L., Yuan, L., Zhou, X., Duan, J., Xiao, H., Cai, N., Han, S., Ma, X., Liu, W. et al. (2019). A structural change in Butyrophilin upon Phosphoantigen binding underlies phosphoantigen-mediated V $\gamma$ 9V $\delta$ 2 T cell activation. *Immunity*.
- Yoshida, Y., Kawata, M., Katayama, M., Horiuchi, H., Kita, Y. and Takai, Y. (1991). A geranylgeranyltransferase for rhoA p21 distinct from the farnesyltransferase for ras p21A. *Biochem. Biophys. Res. Commun.* **175**, 720-728. doi:10.1016/0006-291X(91)91625-M
- Zocchi, M. R., Costa, D., Venè, R., Tosetti, F., Ferrari, N., Minghelli, S., Benelli, R., Scabini, S., Romairone, E., Catellani, S. et al. (2017). Zoledronate can induce colorectal cancer microenvironment expressing BTN3A1 to stimulate effector  $\gamma\delta$  T cells with antitumor activity. *Oncoimmunology* **6**, e1278099. doi:10.1080/2162402X.2016.1278099
